# Supplementary material for: Prolonged release of an antimicrobial peptide GL13K-loaded thermosensitive hydrogel on a titanium surface improves its antibacterial and anti-inflammatory properties
Source: Royal Society of Chemistry journal article supplement (doi:10.1039/d3ra03414c), 2023-01-01
Supplement: d3ra03414c1.pdf [file d3ra03414c1.pdf]

**Title:**  
Pro-longed release of antimicrobial peptide GL13K-loaded thermos-sensitive hydrogel on titanium surface improves antibacterial and anti-inflammatory properties

**Supplementary file:**

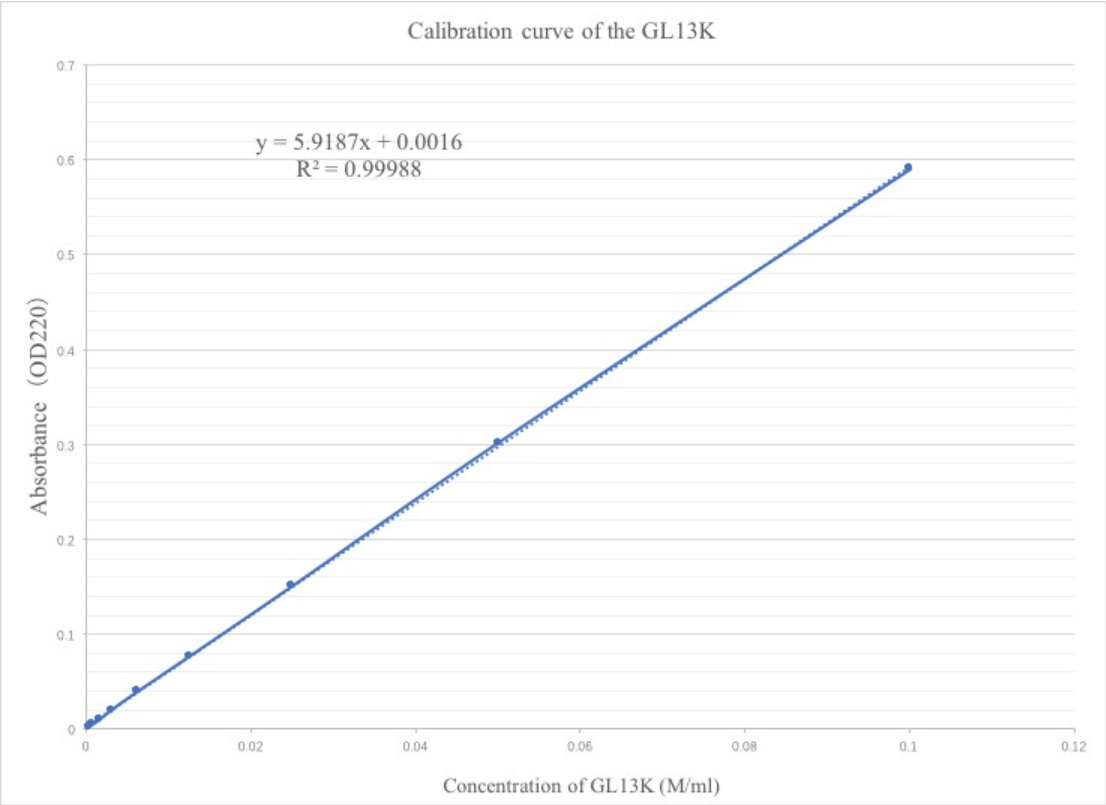

The supplement figure 1: Calibration curve of the GL13K.

Table 1 Phase change temperature of temperature-sensitive hydrogels loaded with antimicrobial peptide GL13K

| temperature (°C) | 10 | 11 | 12 | 13 | 14 | 15 | 16 | 17 | 18 | 19 | 20 |
|------------------|----|----|----|----|----|----|----|----|----|----|----|
| Gel or not       | -  | -  | -  | -  | -  | -  | +  | +  | +  | +  | +  |
